# Supplementary material for: Crossmodal benefits to vocal emotion perception in cochlear implant users
Source: PubMed Central journal article supplement (PMC9791346; doi:10.1016/j.isci.2022.105711), 2022-12-02
Supplement: mmc1.pdf [file mmc1.pdf]

iScience, Volume 25

## **Supplemental information**

### **Crossmodal benefits to vocal emotion perception in cochlear implant users**

**Celina Isabelle von Eiff, Sascha Frühholz, Daniela Korth, Orlando Guntinas-Lichius, and Stefan Robert Schweinberger**

## Supplementary Figures and Tables, Crossmodal Benefits in CI Users

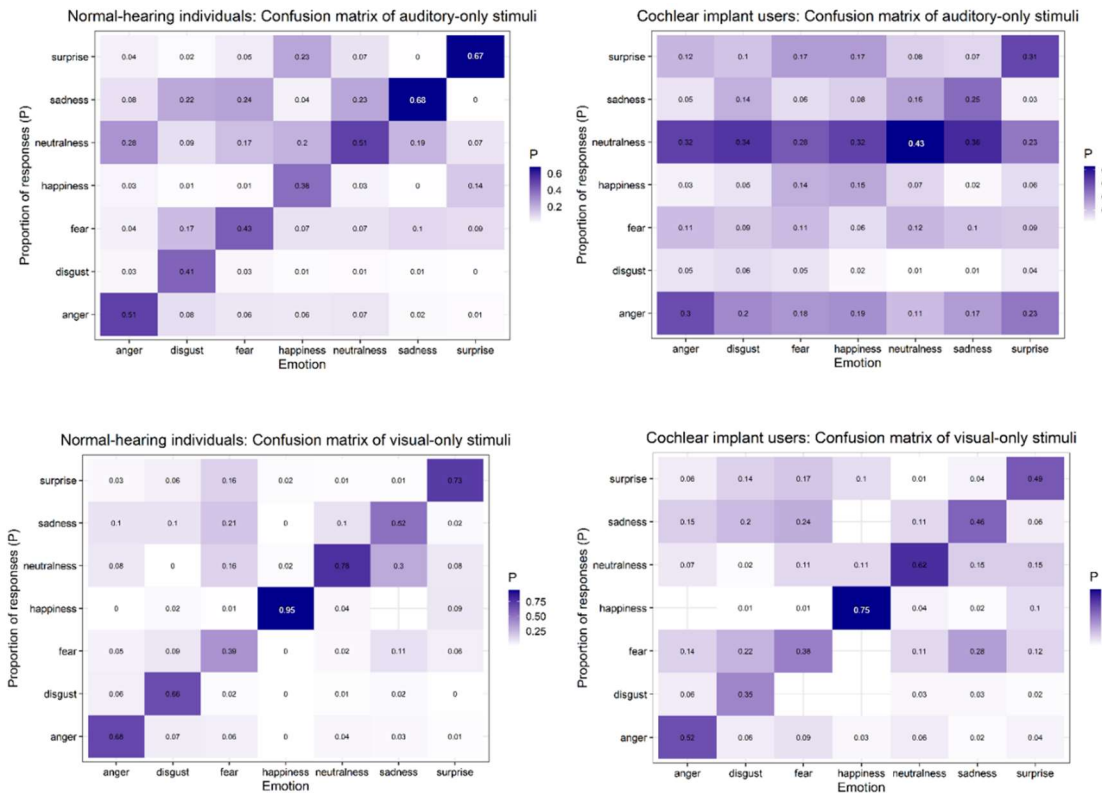

Figure S1. Classification performance of CI users (N = 4) and normal-hearing individuals (N = 22) for auditory-only and visual-only stimuli of the rating study, Related to Limitations of the studies and STAR Methods

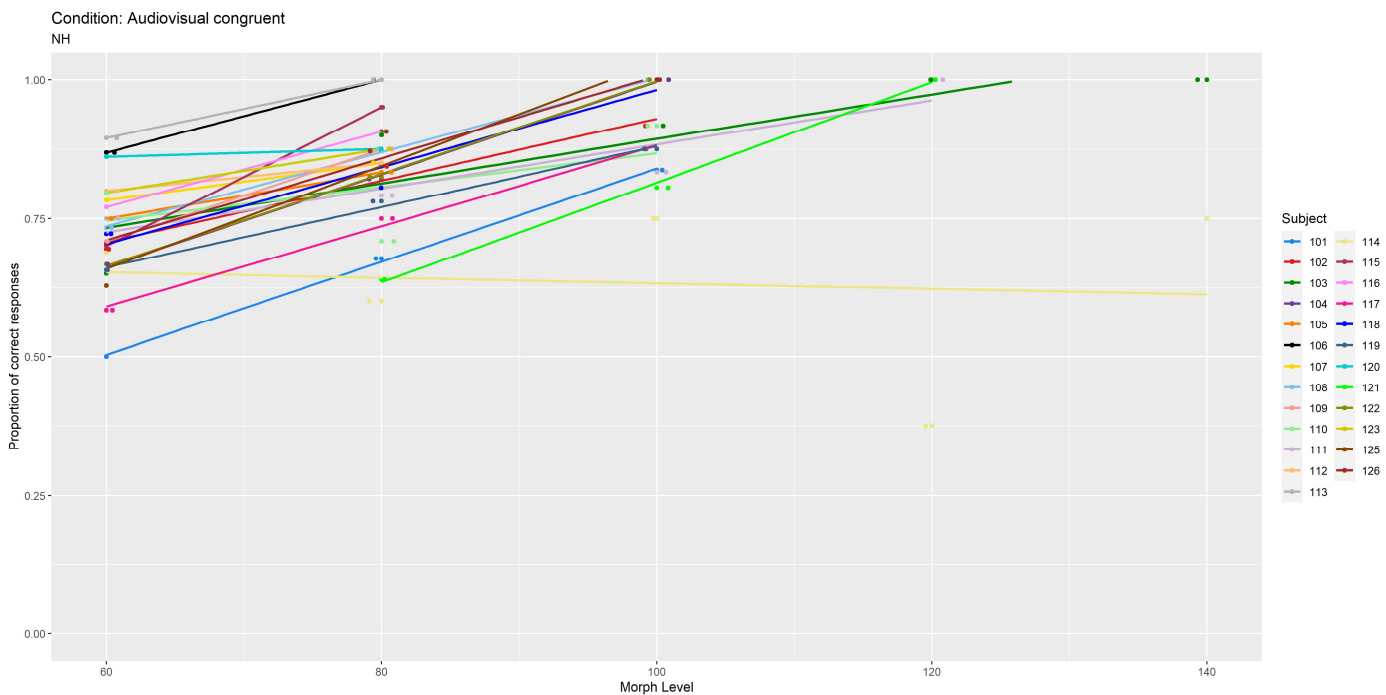

Figure S2. Experiment 2. Proportion of correct responses achieved at each morph level in Experiment 2, audiovisual congruent condition. Colors denote individual normal-hearing (NH) individuals., Related to Limitations of the studies and STAR Methods

Supplementary Figures and Tables, Crossmodal Benefits in CI Users

**Table S1. Time anchor points of auditory stimuli, Related to STAR Methods**

| Pseudoword   | Speaker | Vocal and Facial Emotion | TA 1         | TA 2         | TA 3         | TA 4         | TA 5         | TA 6         | TA 7         | TA 8         | TA 9         | TA 10        | TA 11       | TA 12        |
|--------------|---------|--------------------------|--------------|--------------|--------------|--------------|--------------|--------------|--------------|--------------|--------------|--------------|-------------|--------------|
| belam        | WK01    | VA FA (cong)             | 0.51         | 0.526        | 0.592        | 0.664        | 0.71         | 0.753        | 0.793        | 0.83         | 0.866        | 0.903        | 1.018       | 1.149        |
|              |         | VS FA (incong)           | 0.51         | 0.526        | 0.592        | 0.664        | 0.71         | 0.753        | 0.793        | 0.83         | 0.866        | 0.903        | 1.018       | 1.149        |
|              |         | VS FS (cong)             | 0.545        | 0.554        | 0.61         | 0.664        | 0.698        | 0.732        | 0.77         | 0.805        | 0.841        | 0.88         | 0.924       | 0.97         |
|              |         | VA FS (incong)           | 0.545        | 0.554        | 0.61         | 0.664        | 0.698        | 0.732        | 0.77         | 0.805        | 0.841        | 0.88         | 0.924       | 0.97         |
| belam        | HO05    | VA FA (cong)             | 0.543        | 0.562        | 0.613        | 0.663        | 0.703        | 0.743        | 0.808        | 0.876        | 0.943        | 1.009        | 1.089       | 1.167        |
|              |         | VS FA (incong)           | 0.543        | 0.562        | 0.613        | 0.663        | 0.703        | 0.743        | 0.808        | 0.876        | 0.943        | 1.009        | 1.089       | 1.167        |
|              |         | VS FS (cong)             | 0.521        | 0.587        | 0.636        | 0.686        | 0.732        | 0.775        | 0.839        | 0.899        | 0.962        | 1.024        | 1.11        | 1.196        |
|              |         | VA FS (incong)           | 0.521        | 0.587        | 0.636        | 0.686        | 0.732        | 0.775        | 0.839        | 0.899        | 0.962        | 1.024        | 1.11        | 1.196        |
| belam        | MK06    | VA FA (cong)             | 0.533        | 0.548        | 0.607        | 0.67         | 0.715        | 0.755        | 0.811        | 0.871        | 0.928        | 0.988        | 1.053       | 1.121        |
|              |         | VS FA (incong)           | 0.533        | 0.551        | 0.635        | 0.72         | 0.768        | 0.811        | 0.872        | 0.933        | 0.992        | 1.052        | 1.145       | 1.234        |
|              |         | VS FS (cong)             | 0.533        | 0.551        | 0.635        | 0.72         | 0.768        | 0.811        | 0.872        | 0.933        | 0.992        | 1.052        | 1.145       | 1.234        |
|              |         | VA FS (incong)           | 0.533        | 0.548        | 0.607        | 0.67         | 0.715        | 0.755        | 0.811        | 0.871        | 0.928        | 0.988        | 1.053       | 1.121        |
| belam        | JW07    | VA FA (cong)             | 0.516        | 0.54         | 0.649        | 0.763        | 0.796        | 0.831        | 0.906        | 0.983        | 1.057        | 1.129        | 1.196       | 1.26         |
|              |         | VS FA (incong)           | 0.516        | 0.54         | 0.649        | 0.763        | 0.796        | 0.831        | 0.906        | 0.983        | 1.057        | 1.129        | 1.196       | 1.26         |
|              |         | VS FS (cong)             | 0.528        | 0.552        | 0.6          | 0.653        | 0.684        | 0.713        | 0.746        | 0.782        | 0.819        | 0.854        | 0.942       | 1.028        |
|              |         | VA FS (incong)           | 0.528        | 0.552        | 0.6          | 0.653        | 0.684        | 0.713        | 0.746        | 0.782        | 0.819        | 0.854        | 0.942       | 1.028        |
| belam        | LN08    | VA FA (cong)             | 0.509        | 0.532        | 0.58         | 0.625        | 0.681        | 0.736        | 0.805        | 0.874        | 0.939        | 1.003        | 1.13        | 1.253        |
|              |         | VS FA (incong)           | 0.509        | 0.532        | 0.58         | 0.625        | 0.681        | 0.736        | 0.805        | 0.874        | 0.939        | 1.003        | 1.13        | 1.253        |
|              |         | VS FS (cong)             | 0.539        | 0.555        | 0.594        | 0.631        | 0.664        | 0.69         | 0.768        | 0.851        | 0.939        | 1.022        | 1.127       | 1.232        |
|              |         | VA FS (incong)           | 0.539        | 0.555        | 0.594        | 0.631        | 0.664        | 0.69         | 0.768        | 0.851        | 0.939        | 1.022        | 1.127       | 1.232        |
| belam        | MB10    | VA FA (cong)             | 0.541        | 0.557        | 0.597        | 0.636        | 0.675        | 0.715        | 0.762        | 0.808        | 0.859        | 0.906        | 0.991       | 1.074        |
|              |         | VS FA (incong)           | 0.541        | 0.557        | 0.597        | 0.636        | 0.675        | 0.715        | 0.762        | 0.808        | 0.859        | 0.906        | 0.991       | 1.074        |
|              |         | VS FS (cong)             | 0.542        | 0.559        | 0.591        | 0.624        | 0.654        | 0.688        | 0.742        | 0.794        | 0.848        | 0.913        | 0.966       | 1.026        |
|              |         | VA FS (incong)           | 0.542        | 0.559        | 0.591        | 0.624        | 0.654        | 0.688        | 0.742        | 0.794        | 0.848        | 0.913        | 0.966       | 1.026        |
| belam        | LG11    | VA FA (cong)             | 0.527        | 0.544        | 0.584        | 0.62         | 0.66         | 0.701        | 0.763        | 0.823        | 0.884        | 0.943        | 1.019       | 1.102        |
|              |         | VS FA (incong)           | 0.527        | 0.544        | 0.584        | 0.62         | 0.66         | 0.701        | 0.763        | 0.823        | 0.884        | 0.943        | 1.019       | 1.102        |
|              |         | VS FS (cong)             | 0.546        | 0.569        | 0.603        | 0.635        | 0.69         | 0.748        | 0.819        | 0.89         | 0.962        | 1.036        | 1.11        | 1.182        |
|              |         | VA FS (incong)           | 0.546        | 0.569        | 0.603        | 0.635        | 0.69         | 0.748        | 0.819        | 0.89         | 0.962        | 1.036        | 1.11        | 1.182        |
| belam        | TL12    | VA FA (cong)             | 0.515        | 0.529        | 0.561        | 0.593        | 0.619        | 0.645        | 0.682        | 0.72         | 0.759        | 0.798        | 0.87        | 0.943        |
|              |         | VS FA (incong)           | 0.515        | 0.529        | 0.561        | 0.593        | 0.619        | 0.645        | 0.682        | 0.72         | 0.759        | 0.798        | 0.87        | 0.943        |
|              |         | VS FS (cong)             | 0.547        | 0.567        | 0.595        | 0.621        | 0.651        | 0.681        | 0.726        | 0.774        | 0.822        | 0.873        | 0.95        | 1.028        |
|              |         | VA FS (incong)           | 0.547        | 0.567        | 0.595        | 0.621        | 0.651        | 0.681        | 0.726        | 0.774        | 0.822        | 0.873        | 0.95        | 1.028        |
| <i>belam</i> |         | <i>Mean</i>              | <i>0.531</i> | <i>0.552</i> | <i>0.603</i> | <i>0.654</i> | <i>0.694</i> | <i>0.732</i> | <i>0.788</i> | <i>0.845</i> | <i>0.901</i> | <i>0.958</i> | <i>1.04</i> | <i>1.123</i> |
| molen        | WK01    | VA FA (cong)             | 0.526        | 0.62         | 0.7          | 0.771        | 0.861        | 0.95         | 1.012        | 1.075        | 1.143        | 1.21         | 1.364       | 1.523        |
|              |         | VS FA (incong)           | 0.526        | 0.62         | 0.7          | 0.771        | 0.861        | 0.95         | 1.012        | 1.075        | 1.143        | 1.21         | 1.364       | 1.523        |
|              |         | VS FS (cong)             | 0.53         | 0.635        | 0.702        | 0.769        | 0.829        | 0.901        | 0.957        | 1.012        | 1.068        | 1.126        | 1.214       | 1.301        |
|              |         | VA FS (incong)           | 0.53         | 0.635        | 0.702        | 0.769        | 0.829        | 0.901        | 0.957        | 1.012        | 1.068        | 1.126        | 1.214       | 1.301        |
| molen        | HO05    | VA FA (cong)             | 0.539        | 0.618        | 0.69         | 0.761        | 0.797        | 0.833        | 0.884        | 0.935        | 0.992        | 1.048        | 1.112       | 1.177        |
|              |         | VS FA (incong)           | 0.539        | 0.618        | 0.69         | 0.761        | 0.797        | 0.833        | 0.884        | 0.935        | 0.992        | 1.048        | 1.112       | 1.177        |
|              |         | VS FS (cong)             | 0.539        | 0.576        | 0.626        | 0.677        | 0.706        | 0.737        | 0.792        | 0.854        | 0.914        | 0.976        | 1.073       | 1.163        |
|              |         | VA FS (incong)           | 0.539        | 0.576        | 0.626        | 0.677        | 0.706        | 0.737        | 0.792        | 0.854        | 0.914        | 0.976        | 1.073       | 1.163        |
| molen        | MK06    | VA FA (cong)             | 0.539        | 0.587        | 0.669        | 0.751        | 0.803        | 0.851        | 0.906        | 0.96         | 1.015        | 1.072        | 1.157       | 1.246        |
|              |         | VS FA (incong)           | 0.539        | 0.587        | 0.669        | 0.751        | 0.803        | 0.851        | 0.906        | 0.96         | 1.015        | 1.072        | 1.157       | 1.246        |
|              |         | VS FS (cong)             | 0.532        | 0.623        | 0.691        | 0.762        | 0.826        | 0.893        | 0.946        | 0.995        | 1.053        | 1.11         | 1.16        | 1.212        |
|              |         | VA FS (incong)           | 0.532        | 0.623        | 0.691        | 0.762        | 0.826        | 0.893        | 0.946        | 0.995        | 1.053        | 1.11         | 1.16        | 1.212        |

## Supplementary Figures and Tables, Crossmodal Benefits in CI Users

|              |      |                |              |              |              |              |              |              |              |              |              |             |              |              |
|--------------|------|----------------|--------------|--------------|--------------|--------------|--------------|--------------|--------------|--------------|--------------|-------------|--------------|--------------|
| molen        | JW07 | VA FS (incong) | 0.532        | 0.623        | 0.691        | 0.762        | 0.826        | 0.893        | 0.946        | 0.995        | 1.053        | 1.11        | 1.16         | 1.212        |
|              |      | VA FA (cong)   | 0.534        | 0.617        | 0.681        | 0.745        | 0.78         | 0.816        | 0.878        | 0.942        | 1.003        | 1.067       | 1.133        | 1.206        |
|              |      | VS FA (incong) | 0.534        | 0.617        | 0.681        | 0.745        | 0.78         | 0.816        | 0.878        | 0.942        | 1.003        | 1.067       | 1.133        | 1.206        |
|              |      | VS FS (cong)   | 0.529        | 0.62         | 0.666        | 0.713        | 0.744        | 0.774        | 0.836        | 0.901        | 0.971        | 1.041       | 1.108        | 1.175        |
| molen        | LN08 | VA FS (incong) | 0.529        | 0.62         | 0.666        | 0.713        | 0.744        | 0.774        | 0.836        | 0.901        | 0.971        | 1.041       | 1.108        | 1.175        |
|              |      | VA FA (cong)   | 0.525        | 0.654        | 0.693        | 0.735        | 0.823        | 0.914        | 0.97         | 1.025        | 1.082        | 1.138       | 1.242        | 1.341        |
|              |      | VS FA (incong) | 0.525        | 0.654        | 0.693        | 0.735        | 0.823        | 0.914        | 0.97         | 1.025        | 1.082        | 1.138       | 1.242        | 1.341        |
|              |      | VS FS (cong)   | 0.52         | 0.586        | 0.612        | 0.639        | 0.678        | 0.722        | 0.769        | 0.819        | 0.873        | 0.923       | 1.015        | 1.108        |
| molen        | MB10 | VA FS (incong) | 0.52         | 0.586        | 0.612        | 0.639        | 0.678        | 0.722        | 0.769        | 0.819        | 0.873        | 0.923       | 1.015        | 1.108        |
|              |      | VA FA (cong)   | 0.552        | 0.615        | 0.652        | 0.686        | 0.722        | 0.758        | 0.804        | 0.851        | 0.898        | 0.948       | 1.02         | 1.098        |
|              |      | VS FA (incong) | 0.552        | 0.615        | 0.652        | 0.686        | 0.722        | 0.758        | 0.804        | 0.851        | 0.898        | 0.948       | 1.02         | 1.098        |
|              |      | VS FS (cong)   | 0.525        | 0.59         | 0.643        | 0.702        | 0.73         | 0.755        | 0.798        | 0.846        | 0.894        | 0.943       | 1.021        | 1.096        |
| molen        | LG11 | VA FS (incong) | 0.525        | 0.59         | 0.643        | 0.702        | 0.73         | 0.755        | 0.798        | 0.846        | 0.894        | 0.943       | 1.021        | 1.096        |
|              |      | VA FA (cong)   | 0.542        | 0.605        | 0.65         | 0.696        | 0.743        | 0.791        | 0.841        | 0.892        | 0.94         | 0.991       | 1.067        | 1.139        |
|              |      | VS FA (incong) | 0.542        | 0.605        | 0.65         | 0.696        | 0.743        | 0.791        | 0.841        | 0.892        | 0.94         | 0.991       | 1.067        | 1.139        |
|              |      | VS FS (cong)   | 0.536        | 0.628        | 0.681        | 0.735        | 0.789        | 0.846        | 0.901        | 0.957        | 1.013        | 1.067       | 1.136        | 1.214        |
| molen        | TL12 | VA FS (incong) | 0.536        | 0.628        | 0.681        | 0.735        | 0.789        | 0.846        | 0.901        | 0.957        | 1.013        | 1.067       | 1.136        | 1.214        |
|              |      | VA FA (cong)   | 0.516        | 0.563        | 0.598        | 0.634        | 0.66         | 0.686        | 0.729        | 0.773        | 0.823        | 0.871       | 0.928        | 0.985        |
|              |      | VS FA (incong) | 0.516        | 0.563        | 0.598        | 0.634        | 0.66         | 0.686        | 0.729        | 0.773        | 0.823        | 0.871       | 0.928        | 0.985        |
|              |      | VS FS (cong)   | 0.523        | 0.621        | 0.66         | 0.699        | 0.731        | 0.763        | 0.808        | 0.857        | 0.901        | 0.949       | 1.034        | 1.126        |
|              |      | VA FS (incong) | 0.523        | 0.621        | 0.66         | 0.699        | 0.731        | 0.763        | 0.808        | 0.857        | 0.901        | 0.949       | 1.034        | 1.126        |
| <i>molen</i> |      | <i>Mean</i>    | <i>0.532</i> | <i>0.610</i> | <i>0.663</i> | <i>0.717</i> | <i>0.764</i> | <i>0.812</i> | <i>0.864</i> | <i>0.918</i> | <i>0.974</i> | <i>1.03</i> | <i>1.112</i> | <i>1.194</i> |
| namil        | WK01 | VA FA (cong)   | 0.516        | 0.63         | 0.7          | 0.768        | 0.824        | 0.877        | 0.939        | 0.998        | 1.055        | 1.11        | 1.199        | 1.287        |
|              |      | VS FA (incong) | 0.516        | 0.63         | 0.7          | 0.768        | 0.824        | 0.877        | 0.939        | 0.998        | 1.055        | 1.11        | 1.199        | 1.287        |
|              |      | VS FS (cong)   | 0.546        | 0.597        | 0.638        | 0.676        | 0.719        | 0.764        | 0.806        | 0.847        | 0.89         | 0.931       | 0.969        | 1.007        |
|              |      | VA FS (incong) | 0.546        | 0.597        | 0.638        | 0.676        | 0.719        | 0.764        | 0.806        | 0.847        | 0.89         | 0.931       | 0.969        | 1.007        |
| namil        | HO05 | VA FA (cong)   | 0.527        | 0.586        | 0.64         | 0.695        | 0.742        | 0.79         | 0.854        | 0.923        | 0.986        | 1.043       | 1.105        | 1.169        |
|              |      | VS FA (incong) | 0.527        | 0.586        | 0.64         | 0.695        | 0.742        | 0.79         | 0.854        | 0.923        | 0.986        | 1.043       | 1.105        | 1.169        |
|              |      | VS FS (cong)   | 0.527        | 0.577        | 0.619        | 0.662        | 0.693        | 0.723        | 0.782        | 0.848        | 0.912        | 0.979       | 1.05         | 1.116        |
|              |      | VA FS (incong) | 0.527        | 0.577        | 0.619        | 0.662        | 0.693        | 0.723        | 0.782        | 0.848        | 0.912        | 0.979       | 1.05         | 1.116        |
| namil        | MK06 | VA FA (cong)   | 0.543        | 0.611        | 0.699        | 0.781        | 0.854        | 0.925        | 0.99         | 1.051        | 1.114        | 1.175       | 1.238        | 1.299        |
|              |      | VS FA (incong) | 0.543        | 0.611        | 0.699        | 0.781        | 0.854        | 0.925        | 0.99         | 1.051        | 1.114        | 1.175       | 1.238        | 1.299        |
|              |      | VS FS (cong)   | 0.536        | 0.592        | 0.654        | 0.715        | 0.765        | 0.822        | 0.872        | 0.919        | 0.972        | 1.023       | 1.109        | 1.196        |
|              |      | VA FS (incong) | 0.536        | 0.592        | 0.654        | 0.715        | 0.765        | 0.822        | 0.872        | 0.919        | 0.972        | 1.023       | 1.109        | 1.196        |
| namil        | JW07 | VA FA (cong)   | 0.513        | 0.614        | 0.681        | 0.748        | 0.793        | 0.836        | 0.907        | 0.976        | 1.043        | 1.105       | 1.158        | 1.215        |
|              |      | VS FA (incong) | 0.513        | 0.614        | 0.681        | 0.748        | 0.793        | 0.836        | 0.907        | 0.976        | 1.043        | 1.105       | 1.158        | 1.215        |
|              |      | VS FS (cong)   | 0.513        | 0.578        | 0.622        | 0.664        | 0.701        | 0.733        | 0.787        | 0.84         | 0.892        | 0.952       | 1            | 1.052        |
|              |      | VA FS (incong) | 0.513        | 0.578        | 0.622        | 0.664        | 0.701        | 0.733        | 0.787        | 0.84         | 0.892        | 0.952       | 1            | 1.052        |
| namil        | LN08 | VA FA (cong)   | 0.549        | 0.635        | 0.678        | 0.721        | 0.808        | 0.901        | 0.955        | 1.006        | 1.06         | 1.107       | 1.22         | 1.347        |
|              |      | VS FA (incong) | 0.549        | 0.635        | 0.678        | 0.721        | 0.808        | 0.901        | 0.955        | 1.006        | 1.06         | 1.107       | 1.22         | 1.347        |
|              |      | VS FS (cong)   | 0.529        | 0.633        | 0.67         | 0.708        | 0.744        | 0.782        | 0.832        | 0.888        | 0.941        | 1.003       | 1.074        | 1.148        |
|              |      | VA FS (incong) | 0.529        | 0.633        | 0.67         | 0.708        | 0.744        | 0.782        | 0.832        | 0.888        | 0.941        | 1.003       | 1.074        | 1.148        |
| namil        | MB10 | VA FA (cong)   | 0.536        | 0.575        | 0.617        | 0.657        | 0.704        | 0.753        | 0.793        | 0.827        | 0.865        | 0.907       | 0.992        | 1.072        |
|              |      | VS FA (incong) | 0.536        | 0.575        | 0.617        | 0.657        | 0.704        | 0.753        | 0.793        | 0.827        | 0.865        | 0.907       | 0.992        | 1.072        |
|              |      | VS FS (cong)   | 0.515        | 0.614        | 0.652        | 0.689        | 0.739        | 0.787        | 0.827        | 0.865        | 0.901        | 0.943       | 1.012        | 1.083        |
|              |      | VA FS (incong) | 0.515        | 0.614        | 0.652        | 0.689        | 0.739        | 0.787        | 0.827        | 0.865        | 0.901        | 0.943       | 1.012        | 1.083        |
| namil        | LG11 | VA FA (cong)   | 0.539        | 0.596        | 0.642        | 0.684        | 0.733        | 0.79         | 0.861        | 0.93         | 0.993        | 1.053       | 1.108        | 1.163        |
|              |      | VS FA (incong) | 0.539        | 0.596        | 0.642        | 0.684        | 0.733        | 0.79         | 0.861        | 0.93         | 0.993        | 1.053       | 1.108        | 1.163        |

## Supplementary Figures and Tables, Crossmodal Benefits in CI Users

|              |      |                |              |              |              |              |              |              |              |              |              |              |              |              |
|--------------|------|----------------|--------------|--------------|--------------|--------------|--------------|--------------|--------------|--------------|--------------|--------------|--------------|--------------|
|              |      | VS FS (cong)   | 0.546        | 0.582        | 0.639        | 0.693        | 0.772        | 0.855        | 0.909        | 0.97         | 1.026        | 1.086        | 1.142        | 1.199        |
|              |      | VA FS (incong) | 0.546        | 0.582        | 0.639        | 0.693        | 0.772        | 0.855        | 0.909        | 0.97         | 1.026        | 1.086        | 1.142        | 1.199        |
| namil        | TL12 | VA FA (cong)   | 0.518        | 0.536        | 0.562        | 0.587        | 0.626        | 0.669        | 0.718        | 0.763        | 0.813        | 0.864        | 0.925        | 0.988        |
|              |      | VS FA (incong) | 0.518        | 0.536        | 0.562        | 0.587        | 0.626        | 0.669        | 0.718        | 0.763        | 0.813        | 0.864        | 0.925        | 0.988        |
|              |      | VS FS (cong)   | 0.513        | 0.679        | 0.724        | 0.768        | 0.803        | 0.839        | 0.892        | 0.937        | 0.986        | 1.037        | 1.108        | 1.184        |
|              |      | VA FS (incong) | 0.513        | 0.679        | 0.724        | 0.768        | 0.803        | 0.839        | 0.892        | 0.937        | 0.986        | 1.037        | 1.108        | 1.184        |
| <i>namil</i> |      | <i>Mean</i>    | <i>0.529</i> | <i>0.602</i> | <i>0.652</i> | <i>0.701</i> | <i>0.751</i> | <i>0.803</i> | <i>0.858</i> | <i>0.912</i> | <i>0.966</i> | <i>1.020</i> | <i>1.088</i> | <i>1.158</i> |
| loman        | WK01 | VA FA (cong)   | 0.542        | 0.714        | 0.814        | 0.922        | 0.98         | 1.04         | 1.128        | 1.216        | 1.291        | 1.375        | 1.417        | 1.455        |
|              |      | VS FA (incong) | 0.542        | 0.714        | 0.814        | 0.922        | 0.98         | 1.04         | 1.128        | 1.216        | 1.291        | 1.375        | 1.417        | 1.455        |
|              |      | VS FS (cong)   | 0.545        | 0.577        | 0.616        | 0.656        | 0.697        | 0.738        | 0.782        | 0.831        | 0.88         | 0.93         | 0.993        | 1.055        |
|              |      | VA FS (incong) | 0.545        | 0.577        | 0.616        | 0.656        | 0.697        | 0.738        | 0.782        | 0.831        | 0.88         | 0.93         | 0.993        | 1.055        |
| loman        | HO05 | VA FA (cong)   | 0.545        | 0.578        | 0.627        | 0.677        | 0.735        | 0.793        | 0.851        | 0.911        | 0.97         | 1.032        | 1.104        | 1.183        |
|              |      | VS FA (incong) | 0.545        | 0.578        | 0.627        | 0.677        | 0.735        | 0.793        | 0.851        | 0.911        | 0.97         | 1.032        | 1.104        | 1.183        |
|              |      | VS FS (cong)   | 0.514        | 0.552        | 0.588        | 0.627        | 0.669        | 0.708        | 0.768        | 0.829        | 0.89         | 0.952        | 1.034        | 1.113        |
|              |      | VA FS (incong) | 0.514        | 0.552        | 0.588        | 0.627        | 0.669        | 0.708        | 0.768        | 0.829        | 0.89         | 0.952        | 1.034        | 1.113        |
| loman        | MK06 | VA FA (cong)   | 0.529        | 0.617        | 0.715        | 0.816        | 0.864        | 0.913        | 0.965        | 1.02         | 1.073        | 1.131        | 1.194        | 1.261        |
|              |      | VS FA (incong) | 0.529        | 0.617        | 0.715        | 0.816        | 0.864        | 0.913        | 0.965        | 1.02         | 1.073        | 1.131        | 1.194        | 1.261        |
|              |      | VS FS (cong)   | 0.517        | 0.577        | 0.648        | 0.719        | 0.77         | 0.824        | 0.884        | 0.949        | 1.01         | 1.081        | 1.132        | 1.185        |
|              |      | VA FS (incong) | 0.517        | 0.577        | 0.648        | 0.719        | 0.77         | 0.824        | 0.884        | 0.949        | 1.01         | 1.081        | 1.132        | 1.185        |
| loman        | JW07 | VA FA (cong)   | 0.515        | 0.6          | 0.65         | 0.705        | 0.761        | 0.817        | 0.888        | 0.965        | 1.038        | 1.112        | 1.173        | 1.24         |
|              |      | VS FA (incong) | 0.515        | 0.6          | 0.65         | 0.705        | 0.761        | 0.817        | 0.888        | 0.965        | 1.038        | 1.112        | 1.173        | 1.24         |
|              |      | VS FS (cong)   | 0.52         | 0.586        | 0.621        | 0.651        | 0.697        | 0.747        | 0.815        | 0.883        | 0.947        | 1.013        | 1.059        | 1.101        |
|              |      | VA FS (incong) | 0.52         | 0.586        | 0.621        | 0.651        | 0.697        | 0.747        | 0.815        | 0.883        | 0.947        | 1.013        | 1.059        | 1.101        |
| loman        | LN08 | VA FA (cong)   | 0.515        | 0.623        | 0.664        | 0.703        | 0.767        | 0.829        | 0.898        | 0.964        | 1.029        | 1.101        | 1.21         | 1.327        |
|              |      | VS FA (incong) | 0.515        | 0.623        | 0.664        | 0.703        | 0.767        | 0.829        | 0.898        | 0.964        | 1.029        | 1.101        | 1.21         | 1.327        |
|              |      | VS FS (cong)   | 0.516        | 0.609        | 0.638        | 0.667        | 0.695        | 0.717        | 0.779        | 0.846        | 0.911        | 0.98         | 1.083        | 1.189        |
|              |      | VA FS (incong) | 0.516        | 0.609        | 0.638        | 0.667        | 0.695        | 0.717        | 0.779        | 0.846        | 0.911        | 0.98         | 1.083        | 1.189        |
| loman        | MB10 | VA FA (cong)   | 0.534        | 0.577        | 0.603        | 0.629        | 0.673        | 0.716        | 0.766        | 0.813        | 0.864        | 0.916        | 0.982        | 1.052        |
|              |      | VS FA (incong) | 0.534        | 0.577        | 0.603        | 0.629        | 0.673        | 0.716        | 0.766        | 0.813        | 0.864        | 0.916        | 0.982        | 1.052        |
|              |      | VS FS (cong)   | 0.502        | 0.583        | 0.617        | 0.654        | 0.69         | 0.728        | 0.773        | 0.818        | 0.869        | 0.923        | 1.007        | 1.091        |
|              |      | VA FS (incong) | 0.502        | 0.583        | 0.617        | 0.654        | 0.69         | 0.728        | 0.773        | 0.818        | 0.869        | 0.923        | 1.007        | 1.091        |
| loman        | LG11 | VA FA (cong)   | 0.528        | 0.646        | 0.691        | 0.732        | 0.79         | 0.856        | 0.918        | 0.984        | 1.049        | 1.115        | 1.189        | 1.263        |
|              |      | VS FA (incong) | 0.528        | 0.646        | 0.691        | 0.732        | 0.79         | 0.856        | 0.918        | 0.984        | 1.049        | 1.115        | 1.189        | 1.263        |
|              |      | VS FS (cong)   | 0.53         | 0.604        | 0.66         | 0.716        | 0.77         | 0.826        | 0.894        | 0.964        | 1.036        | 1.112        | 1.192        | 1.273        |
|              |      | VA FS (incong) | 0.53         | 0.604        | 0.66         | 0.716        | 0.77         | 0.826        | 0.894        | 0.964        | 1.036        | 1.112        | 1.192        | 1.273        |
| loman        | TL12 | VA FA (cong)   | 0.511        | 0.541        | 0.561        | 0.583        | 0.614        | 0.65         | 0.704        | 0.763        | 0.817        | 0.876        | 0.921        | 0.965        |
|              |      | VS FA (incong) | 0.511        | 0.541        | 0.561        | 0.583        | 0.614        | 0.65         | 0.704        | 0.763        | 0.817        | 0.876        | 0.921        | 0.965        |
|              |      | VS FS (cong)   | 0.512        | 0.624        | 0.652        | 0.678        | 0.712        | 0.752        | 0.798        | 0.848        | 0.899        | 0.951        | 1.028        | 1.109        |
|              |      | VA FS (incong) | 0.512        | 0.624        | 0.652        | 0.678        | 0.712        | 0.752        | 0.798        | 0.848        | 0.899        | 0.951        | 1.028        | 1.109        |
| <i>loman</i> |      | <i>Mean</i>    | <i>0.523</i> | <i>0.601</i> | <i>0.648</i> | <i>0.696</i> | <i>0.743</i> | <i>0.791</i> | <i>0.851</i> | <i>0.93</i>  | <i>0.973</i> | <i>1.038</i> | <i>1.107</i> | <i>1.179</i> |

Note: We used twelve time anchor points of congruent vocal emotions to inform temporal morphing of incongruent vocal emotions towards the identical time structure. VA FA (cong) – “vocal anger, facial anger (congruent)”, VS FA (incong) – “vocal surprise, facial anger (incongruent)”, VS FS (cong) – “vocal surprise, facial surprise (congruent)”, VA FS (incong) – “vocal anger, facial surprise (incongruent)”, all values in seconds

Table S2. Demographic characteristics of CI users, Related to STAR Methods

| CI user             | Sex | Age  | Civil status | Pre-/post-deaf | Age at deafness | Age at first CI | Mode of hearing | Left CI        |               |           | Right CI       |               |           |
|---------------------|-----|------|--------------|----------------|-----------------|-----------------|-----------------|----------------|---------------|-----------|----------------|---------------|-----------|
|                     |     |      |              |                |                 |                 |                 | Wear time (hr) | Manufacturer* | Processor | Wear time (hr) | Manufacturer* | Processor |
| <b>Experiment 1</b> |     |      |              |                |                 |                 |                 |                |               |           |                |               |           |
| 1                   | f   | 82   | widowed      | post           | 53              | 57              | CI-bi           | 12-16          | Cochlear      | CP1000    | 12-16          | Cochlear      | CP910     |
| 2                   | f   | 78   | widowed      | pre            | 0               | 77              | CI-right        | /              | /             | /         | 8-12           | AB            | NaidaQ90  |
| 3                   | f   | 54   | married      | post           | 47              | 54              | CI-right        | /              | /             | /         | > 16           | MED-EL        | Sonnet 2  |
| 4                   | f   | 73   | married      | post           | 51              | 73              | CI-left         | 12-16          | MED-EL        | Sonnet 2  | /              | /             | /         |
| 5                   | f   | 67   | married      | pre            | 0               | 30              | CI-bi           | > 16           | MED-EL        | Sonnet    | > 16           | MED-EL        | OPUS2     |
| 6                   | f   | 69   | married      | post           | 57              | 69              | CI-right        | /              | /             | /         | 12-16          | Cochlear      | CP1000    |
| 7                   | f   | 60   | widowed      | post           | 50              | 59              | CI-right        | /              | /             | /         | 12-16          | MED-EL        | Rondo2    |
| 8                   | f   | 64   | married      | post           | 32              | 61              | CI-bi           | 12-16          | AB            | NA        | 12-16          | AB            | NA        |
| 9                   | m   | 60   | married      | post           | 31              | 58              | CI-left         | 12-16          | MED-EL        | Sonnet    | /              | /             | /         |
| 10                  | m   | 61   | single       | pre            | 0               | 59              | CI-right        | /              | /             | /         | 8-12           | Cochlear      | CP1000    |
| 11                  | f   | 45   | married      | post           | 14              | 44              | CI-right        | /              | /             | /         | 8-12           | MED-EL        | Sonnet 2  |
| 12                  | f   | 60   | married      | post           | 59              | 60              | CI-right        | /              | /             | /         | 12-16          | Cochlear      | NA        |
| 13                  | m   | 65   | married      | post           | 20              | 64              | CI-bi           | 12-16          | Cochlear      | CP1000    | 12-16          | Cochlear      | CP1000    |
| 14                  | m   | 34   | single       | post           | 20              | 31              | CI-bi           | > 16           | MED-EL        | Rondo     | 0-4            | MED-EL        | Sonnet    |
| 15                  | m   | 69   | married      | post           | 8               | 49              | CI-bi           | > 16           | MED-EL        | Sonnet    | > 16           | MED-EL        | Sonnet    |
| 16                  | m   | 20   | single       | post           | 3               | 3               | CI-left         | > 16           | MED-EL        | Sonnet 2  | /              | /             | /         |
| 17                  | f   | 51   | single       | post           | 6               | 46              | CI-bi           | > 16           | AB            | Q 70      | > 16           | AB            | NaidaQ90  |
| 18                  | f   | 30   | single       | pre            | 0               | 26              | CI-bi           | 12-16          | Cochlear      | CP910     | 12-16          | Cochlear      | CP1000    |
| 19                  | m   | 30   | single       | post           | 3               | 24              | CI-bi           | 12-16          | Cochlear      | CP1000    | 12-16          | Cochlear      | CP1000    |
| 20                  | f   | 58   | married      | pre            | 2               | 39              | CI-right        | /              | /             | /         | > 16           | MED-EL        | Sonnet    |
| 21                  | f   | 33   | single       | post           | 7               | 26              | CI-left         | 12-16          | Cochlear      | CP1000    | /              | /             | /         |
| 22                  | f   | 53   | divorced     | pre            | 0               | 48              | CI-bi           | > 16           | MED-EL        | Sonnet 2  | > 16           | MED-EL        | Sonnet 2  |
| 23                  | f   | 70   | married      | post           | 49              | 49              | CI-right        | /              | /             | /         | 12-16          | MED-EL        | OPUS 2    |
| 24                  | m   | 67   | married      | post           | 43              | 55              | CI-right        | /              | /             | /         | > 16           | AB            | NaidaQ90  |
| 25                  | m   | 54   | divorced     | pre            | 0               | 53              | CI-left         | > 16           | Cochlear      | CP1000    | /              | /             | /         |
| 26                  | f   | 40   | single       | pre            | 0               | 38              | CI-right        | /              | /             | /         | > 16           | Cochlear      | CP910     |
| <i>M</i>            |     | 55.7 |              |                | 21.35           | 48.15           |                 |                |               |           |                |               |           |
| <i>SD</i>           |     | 16.1 |              |                | 22.28           | 17.20           |                 |                |               |           |                |               |           |
| <i>Min</i>          |     | 20   |              |                | 0               | 3               |                 |                |               |           |                |               |           |
| <i>Max</i>          |     | 82   |              |                | 59              | 77              |                 |                |               |           |                |               |           |
| <i>N</i>            | 26  | 26   | 26           | 26             | 26              | 26              | 26              | 26             | 26            | 26        | 26             | 26            | 26        |
| <b>Experiment 2</b> |     |      |              |                |                 |                 |                 |                |               |           |                |               |           |
| 1                   | f   | 49   | married      | pre            | 0               | 44              | CI-bi           | > 16           | Cochlear      | CP1000    | > 16           | Cochlear      | CP1000    |
| 2                   | f   | 62   | married      | post           | 48              | 61              | CI-right        | /              | /             | /         | 12-16          | Cochlear      | CP1000    |
| 3                   | m   | 58   | married      | post           | 30              | 50              | CI-bi           | > 16           | Cochlear      | CP1000    | > 16           | Cochlear      | CP1000    |

Supplementary Figures and Tables, Crossmodal Benefits in CI Users

|            |    |      |          |      |       |       |          |       |          |          |       |          |          |
|------------|----|------|----------|------|-------|-------|----------|-------|----------|----------|-------|----------|----------|
| 4          | f  | 40   | single   | pre  | 0     | 38    | CI-right | /     | /        | /        | > 16  | Cochlear | CP910    |
| 5          | m  | 43   | single   | post | 19    | 25    | CI-bi    | 12-16 | MED-EL   | NA       | 12-16 | MED-EL   | NA       |
| 6**        | f  | 39   | married  | post | 16    | 39    | CI-left  | > 16  | MED-EL   | Sonnet   | /     | /        | /        |
| 7**        | f  | 58   | single   | post | 17    | 57    | CI-left  | > 16  | AB       | NaidaQ90 | /     | /        | /        |
| 8**        | f  | 45   | single   | post | 41    | 45    | CI-left  | 8-12  | Cochlear | CP1000   | /     | /        | /        |
| 9**        | m  | 60   | married  | post | 31    | 58    | CI-left  | 12-16 | MED-EL   | Sonnet   | /     | /        | /        |
| 10**       | m  | 61   | single   | pre  | 0     | 59    | CI-right | /     | /        | /        | 8-12  | Cochlear | CP1000   |
| 11**       | f  | 45   | married  | post | 14    | 44    | CI-right | /     | /        | /        | 8-12  | MED-EL   | Sonnet 2 |
| 12**       | f  | 60   | married  | post | 59    | 60    | CI-right | /     | /        | /        | 12-16 | Cochlear | NA       |
| 13         | m  | 65   | married  | post | 20    | 64    | CI-bi    | 12-16 | Cochlear | CP1000   | 12-16 | Cochlear | CP1000   |
| 14         | m  | 34   | single   | post | 20    | 31    | CI-bi    | > 16  | MED-EL   | Rondo    | 0-4   | MED-EL   | Sonnet   |
| 15         | m  | 69   | married  | post | 8     | 49    | CI-bi    | > 16  | MED-EL   | Sonnet   | > 16  | MED-EL   | Sonnet   |
| 16**       | f  | 25   | single   | pre  | 0     | 2     | CI-bi    | > 16  | MED-EL   | Sonnet   | > 16  | MED-EL   | Sonnet   |
| 17**       | f  | 51   | single   | post | 6     | 46    | CI-bi    | > 16  | AB       | Q 70     | > 16  | AB       | NaidaQ90 |
| 18         | f  | 30   | single   | pre  | 0     | 26    | CI-bi    | 12-16 | Cochlear | CP910    | 12-16 | Cochlear | CP1000   |
| 19         | m  | 30   | single   | post | 3     | 24    | CI-bi    | 12-16 | Cochlear | CP1000   | 12-16 | Cochlear | CP1000   |
| 20         | f  | 58   | married  | pre  | 2     | 39    | CI-right | /     | /        | /        | > 16  | MED-EL   | Sonnet   |
| 21**       | f  | 33   | single   | post | 7     | 26    | CI-left  | 12-16 | Cochlear | CP1000   | /     | /        | /        |
| 22         | f  | 53   | divorced | pre  | 0     | 48    | CI-bi    | > 16  | MED-EL   | Sonnet 2 | > 16  | MED-EL   | Sonnet 2 |
| 23         | f  | 70   | married  | post | 49    | 49    | CI-right | /     | /        | /        | 12-16 | MED-EL   | OPUS 2   |
| 24         | m  | 67   | married  | post | 43    | 55    | CI-right | /     | /        | /        | > 16  | AB       | NaidaQ90 |
| 25         | m  | 54   | divorced | pre  | 0     | 53    | CI-left  | > 16  | Cochlear | CP1000   | /     | /        | /        |
| <i>M</i>   |    | 50.4 |          |      | 17.32 | 43.68 |          |       |          |          |       |          |          |
| <i>SD</i>  |    | 13.3 |          |      | 18.42 | 14.82 |          |       |          |          |       |          |          |
| <i>Min</i> |    | 25   |          |      | 0     | 2     |          |       |          |          |       |          |          |
| <i>Max</i> |    | 70   |          |      | 59    | 64    |          |       |          |          |       |          |          |
| <i>N</i>   | 25 | 25   | 25       | 25   | 25    | 25    | 25       | 25    | 25       | 25       | 25    | 25       | 25       |

CI, cochlear implant; CI-bi, bilateral implanted CI user; CI-left, unilateral implanted CI user who was fitted with the CI on the left ear; CI-right, unilateral implanted CI user who was fitted with the CI on the right ear; post = postlingually deafened; pre = prelingually deafened.

\*CI Manufacturers: AB (Advanced Bionics GmbH), Max-Eyth-Str. 20, 70736 Fellbach-Oeffingen, Germany; Cochlear Headquarters, 1 University Avenue, Macquarie University, NSW, 2109, Australia; MED-EL Elektromedizinische Geräte Gesellschaft m.b.H., Fürstenweg 77a, 6020 Innsbruck, Austria.

\*\* CI user was part of the subgroup.
